# Supplementary material for: Computational investigation of van der Waals corrections in the adsorption properties of molecules on the Cu(111) surface
Source: Royal Society of Chemistry journal article supplement (doi:10.1039/d2cp02663e), 2022-01-01
Supplement: d2cp02663e1.pdf [file d2cp02663e1.pdf]

# Electronic Supplementary Information: Computational Investigation of van der Waals Corrections in the Adsorption Properties of Molecules on the Cu(111) Surface

Eduardo O. Bartaquim,<sup>\*,†</sup> Raquel C. Bezerra,<sup>\*,‡</sup> Albert F. B. Bittencourt,<sup>\*,¶</sup> and  
Juarez L. F. Da Silva<sup>\*,†</sup>

<sup>†</sup>*São Carlos Institute of Chemistry, University of São Paulo, P.O. Box 780, 13560-970, São Carlos,  
SP, Brazil*

<sup>‡</sup>*Secretaria de Estado de Educação e Qualidade do Ensino (SEDUC) do Estado do Amazonas,  
Escola Áurea Pinheiro Braga Av. Perimentral, s/n, Lot. Cidade do Leste, Gilberto Mestrinho,  
69089-340, Manaus, AM, Brazil*

<sup>¶</sup>*School of Chemical Engineering, University of Campinas, 13083-970, Campinas, SP, Brazil*

E-mail: eduardoorlando34@gmail.com; racosbez@gmail.com; albertbittenc@gmail.com;  
juarez\_dasilva@iqsc.usp.br

## Contents

|                                                                       |            |
|-----------------------------------------------------------------------|------------|
| <b>S1 Introduction</b>                                                | <b>S-2</b> |
| <b>S2 Selected van der Waals Corrections for DFT-PBE Calculations</b> | <b>S-3</b> |
| S2.1 Grimme D2 . . . . .                                              | S-4        |
| S2.2 Grimme D3 and D3(BJ) . . . . .                                   | S-5        |
| S2.3 Tkatchenko–Scheffler . . . . .                                   | S-6        |

|                                                                           |             |
|---------------------------------------------------------------------------|-------------|
| S2.4 Tkatchenko–Scheffler with Iterative Hirshfeld Partitioning . . . . . | S-7         |
| S2.5 Tkatchenko–Scheffler with Self-consistent Screening . . . . .        | S-8         |
| S2.6 Density-dependent Dispersion Correction . . . . .                    | S-9         |
| <b>S3 Technical Details of the PAW Projectors</b>                         | <b>S-10</b> |
| <b>S4 Computational Convergence Tests</b>                                 | <b>S-11</b> |
| <b>S5 Equilibrium Bulk Properties</b>                                     | <b>S-13</b> |
| <b>S6 Clean Surface Properties</b>                                        | <b>S-15</b> |
| <b>S7 Gas-phase Molecules</b>                                             | <b>S-19</b> |
| <b>S8 Adsorption Properties of Molecules on the Cu(111) Surface</b>       | <b>S-20</b> |
| <b>References</b>                                                         | <b>S-25</b> |

## **S1 Introduction**

This document contains additional computational details employed along this work as well as complementary analyses, e.g.,

1. Section S2 summarizes additional details on the formalism of the van der Waals (vdW) corrections used in the calculations.
2. Section S3 describes the projectors chosen for the projector-augmented wave (PAW) method.
3. Section S4 provides computational convergence tests for the bulk Cu in the face-centered cubic (fcc) phase as a function of the cutoff energy and the number of  $\mathbf{k}$ -points for the Brillouin integration.
4. Section S5 reports the equilibrium lattice constant, the cohesion energy, and the mechanical properties of the bulk copper. Section S6 provide additional details on the properties of the clean Cu(111) surface.

5. Section S7 contains the structural and energetic properties of the selected gas-phase molecules. Finally,
6. Section S8 summarizes specific adsorption features such as metal-molecule vertical distance, work function change, structural variations in the adsorbates, and adsorption energies.

## S2 Selected van der Waals Corrections for DFT-PBE Calculations

Although density functional theory (DFT) is exact in theory,<sup>1,2</sup> in practice various approximations are necessary to solve the Kohn–Sham (KS) equations, especially for the exchange–correlation (XC) energy functional.<sup>3</sup> Local and semilocal XC energy functionals cannot provide an accurate description of the instantaneous electronic density fluctuations, which are the source of dispersion forces. Furthermore, most XC functionals only consider local properties to obtain XC energy, whereas vdW forces are derived from a non-local phenomenon.<sup>3</sup> The energy associated with the vdW forces is widely known to decay exponentially with  $1/r^6$ , where  $r$  is the interatomic separation. To account for this interaction, a common strategy is to add an energy term ( $E_{energy}^{vdW}$ ) to the total energy obtained from the DFT calculations ( $E_{tot}^{DFT}$ ), i.e.,

$$E_{tot} = E_{tot}^{DFT} + E_{energy}^{vdW} . \quad (1)$$

In this study, the following vdW corrections were used in the calculations to compare their performance: (i) Grimme D2,<sup>4</sup> (ii) Grimme D3,<sup>5,6</sup> (iii) Grimme D3 with Becke–Jonson damping factor (denoted as D3(BJ)),<sup>7</sup> (iv) Tkatchenko–Scheffler (TS),<sup>8</sup> (v) Tkatchenko–Scheffler with Self-consistent screening (TS+SCS),<sup>9</sup> (vi) Tkatchenko–Scheffler with iterative Hirshfeld partitioning (TS+HI),<sup>10,11</sup> and (vii) density-dependent dispersion correction (dDsC).<sup>12,13</sup> The vdW energy for all corrections takes the following form,

$$E_{energy}^{vdW} = \sum_{AB} \sum_{n=6,8} s_n \frac{C_n^{AB}}{R_{AB}^n} f_{d,n}(R_{AB}) , \quad (2)$$

where  $C_n^{AB}$  is the dispersion coefficient,  $R_{AB}^n$  is the distance between atoms  $A$  and  $B$ ,  $f_{d,n}(R_{AB})$  is a damping function required to avoid divergence when the value of  $R_{AB}^n$  is small, and  $s_n$  is a global scaling factor. The main difference between the schemes chosen for this study is found in the terms  $C_n^{AB}$  and  $f_{d,n}(R_{AB})$ . In the next sections, these distinctions will be examined.

## S2.1 Grimme D2

Grimme's D2 approach<sup>4</sup> is a semi-empirical method where the dispersion coefficient has the form,

$$C_6^{AB} = \sqrt{C_6^A C_6^B}, \quad (3)$$

with

$$C_6^A = 0.05 N I_p^A \alpha^A, \quad (4)$$

where  $I_p^A$  and  $\alpha^A$  are, respectively, the ionization potential and static dipole polarizabilities obtained with DFT-PBE0.<sup>14</sup> The quantity  $N$  assumes the values of 2, 10, 18, 36 and 54 for the first five periods of the periodic table. When PBE is employed, the global scaling factor takes the value of 0.75 and the damping function is provided by a Fermi-like equation:

$$f_{d,n}(R_{AB}) = \frac{1}{1 + e^{-d(R_{AB}/R_r)-1}}, \quad (5)$$

in which  $d$  controls the damping region and  $R_r$  represents the sum of the atomic vdW radii. The key problem with the D2 approach is the dispersion coefficient, which does not take into account variations in the chemical environment; the value remains the same regardless of variations in hybridization or oxidation state. To overcome this problem, the methods D3, TS, and dDsC were proposed.<sup>5,6,8,10,11</sup>

## S2.2 Grimme D3 and D3(BJ)

In Grimme's D3 scheme, the dispersion coefficient is calculated using the Casimir–Polder equation,<sup>15</sup> which is defined as,

$$C_6^{AB} = \frac{3}{\pi} \int_0^\infty \alpha_A(i\omega) \alpha_B(i\omega) d\omega, \quad (6)$$

in which  $\alpha$  depends on imaginary frequencies. The global scaling factor is now only adjusted when  $n > 6$ . In this scheme, the vdW energy is the sum of the two-body component of Equation 2 and the Axilrod–Teller–Muto triple-dipole term,<sup>16,17</sup> which is provided by,

$$E^{(3)} = \gamma \sum_{ABC} f_{d,3}(\bar{R}_{ABC}) \frac{C_9^{ABC}}{(R_{AB}R_{AC}R_{BC})^3}, \quad (7)$$

where  $\gamma$  is a constant that depends on the angles of the triangle  $\triangle R_{AB}R_{AC}R_{BC}$  and the ternary dispersion coefficient  $C_9^{ABC}$ , which is defined as,

$$C_9^{ABC} \approx -\sqrt{C_6^{AB}C_6^{AC}C_6^{BC}}. \quad (8)$$

In the D3 dispersion correction, the chemical environment is taken into account using the coordination number of the atoms, more precisely the fractional coordination number,<sup>6</sup> which for a given atom  $A$  is defined as,

$$CN^A = \sum_{B \neq A}^{N_{at}} \frac{1}{1 + e^{-k_1(k_2(R_{A,cov} + R_{B,cov})/r_{AB} - 1)}}, \quad (9)$$

where  $N_{at}$  is the number of atoms in the chemical system,  $R_{A,cov}$  and  $R_{B,cov}$  are the scaled covalent radius of atoms  $A$  and  $B$ , respectively, and  $k_1$  and  $k_2$  are parameters with values of 16 and 4/3. Reference molecules are now used to determine the values of  $\alpha_A(i\omega)$ , while the dispersion coefficients for pairs of atoms in various chemical environments ( $C_{6,ref}^{AB}$ ) can be obtained using Equation 6. Finally, the coefficients are employed as support points in an

interpolation procedure based on the following equations:

$$C_6^{AB}(CN^A, CN^B) = \frac{Z}{W}, \quad (10)$$

$$Z = \sum_i^{N_A} \sum_j^{N_B} C_{6,ref}^{AB}(CN_i^A, CN_j^B) L_{ij}, \quad (11)$$

$$W = \sum_i^{N_A} \sum_j^{N_B} L_{ij}, \quad (12)$$

$$L_{ij} = e^{-k_3[(CN^A - CN_i^A)^2 + (CN^B - CN_j^B)^2]}, \quad (13)$$

where  $N_A$  and  $N_B$  are the number of supporting points for atoms  $A$  and  $B$ ,  $CN_i^A$  and  $CN_j^B$  are the coordination numbers for the atoms in the reference systems  $i$  and  $j$ . Another essential factor is the damping function. When the distance between the atoms is small, the damping function can be zero or a finite number; in the former case, the function is a zero-damping function, while in the latter case, the function is a finite damping function. The original D3 scheme employs a zero-damping function proposed by Chai et al.<sup>5</sup> however, this function can be replaced by a finite damping function proposed by Grimme et al., resulting in the D3(BJ) vdW correction.<sup>7</sup>

### S2.3 Tkatchenko–Scheffler

In the case of the TS method,<sup>8</sup> the parameters  $C_n^{AB}$  and  $f_{d,n}$  are charge density-dependent. The dispersion coefficient is calculated as follows,

$$C_6^{AB} = \frac{2C_6^{AA}C_6^{BB}}{\frac{\alpha_0^B}{\alpha_0^A}C_6^{AA} + \frac{\alpha_0^A}{\alpha_0^B}C_6^{BB}}, \quad (14)$$

where:

$$\alpha_A = \frac{V_{eff}^A}{V_{free}^A} \alpha_A^{free}, \quad (15)$$

$$C_6^{AA} = \left( \frac{V_{eff}^A}{V_{free}^A} \right)^2 C_{6AA}^{free}, \quad (16)$$

in which  $\alpha_A^{free}$  is the free-atom polarization, and  $V_{eff}^A$  and  $V_{free}^A$  correspond to the volume of atom  $A$  within a molecule and its volume as an isolated atom, respectively.

The division of  $V_{eff}^A$  by  $V_{free}^A$  represents the point in the TS method where the dependence on the chemical environment is introduced and is given by,

$$\frac{V_{eff}^A}{V_{free}^A} = \frac{\int r^3 w_A(\mathbf{r}) \rho(\mathbf{r}) d^3 \mathbf{r}}{\int r^3 \rho_A^{free}(\mathbf{r}) d^3(\mathbf{r})}, \quad (17)$$

where  $\rho_A^{free}(\mathbf{r})$  is the spherically averaged electron density of the neutral free atomic species and  $w_A(\mathbf{r})$  is the Hirshfeld weight, which is calculated as,

$$w_A(\mathbf{r}) = \frac{\rho_A^{free}(\mathbf{r})}{\sum_B \rho_B^{free}(\mathbf{r})}. \quad (18)$$

Finally, the damping function takes the form of a Fermi-like equation:

$$f_{d,n}(R_{AB}, R_{AB}^0) = \frac{1}{1 + \exp \left[ -d \left( \frac{R_{AB}}{s_r R_{AB}^0} - 1 \right) \right]}, \quad (19)$$

where:

$$R_{AB}^0 = R_A^0 + R_B^0, \quad (20)$$

and

$$R_A^0 = \left( \frac{\alpha_{eff}^A}{\alpha_{free}^A} \right)^{1/3} R_A^{free}. \quad (21)$$

## S2.4 Tkatchenko–Scheffler with Iterative Hirshfeld Partitioning

The Tkatchenko–Scheffler approach has certain significant limitations, such as failing when electrostatic interactions and dispersion effects become both relevant. This occurs because Hirshfeld partitioning uses neutral atoms as a reference system to determine the effective volume of atoms in a molecule. Consequently, the electronic density of the atoms within a molecule will be similar to that of the isolated atoms. This is not an issue for systems such as molecular solids or layered crystals, but for ionic solids, issues may arise.<sup>10,11</sup> In TS+HI approach, this problem

is addressed by overriding the Hirshfeld weight function (Equation 18) by the Hirshfeld iterative algorithm.<sup>18</sup> The reference system consists of fractionally charged ions generated by an iterative approach that begins with the selection of a promolecular electron density, which is determined by neutral atoms that do not interact.

The Hirshfeld weight function for step  $i$  is then calculated using the following equations,

$$w_A^i(\mathbf{r}) = \frac{\rho_A^i(\mathbf{r})}{\sum \rho_B^i(\mathbf{r})}. \quad (22)$$

The number of electrons in step  $ii$  is defined by the following:

$$N_A^{i+1} = N_A^i + \int [\rho_A^i(\mathbf{r}) - w_A^i(\mathbf{r})\rho(\mathbf{r})] d^3\mathbf{r}, \quad (23)$$

then, the charge density of the reference system becomes:

$$\rho_A^{i+1}(\mathbf{r}) = \rho^{lint(N_A^i)}(\mathbf{r}) [uint(N_A^i) - N_A^i] + \rho^{uint(N_A^i)}(\mathbf{r}) [N_A^i - lint(N_A^i)], \quad (24)$$

where  $lint(N_A^i)$  represents the integer part of  $N_A^i$  and  $uint(N_A^i) = lint(N_A^i) + 1$ . The method is repeated until the difference between the two iterative steps meets the requirement of  $\Delta_A^i = |N_A^i - N_{i+1}^A|$ .

## S2.5 Tkatchenko–Scheffler with Self-consistent Screening

Another drawback of the TS approach is related to the screening effects. The method only considers pair-to-pair atom interactions, ignoring the influence of other atoms on this interaction; however, this is not the case in real systems. In the TS+SCS approach this problem is handled using the self-consistent screening equation to obtain the polarizabilities,

$$\alpha_A^{SCS}(\omega) = \alpha_A(\omega) - \alpha_A(\omega) \sum_{A \neq B} \tau_{AB} \alpha_B^{SCS}(\omega). \quad (25)$$



In this situation,  $\tau_{AB}$  is the dipole-dipole interaction tensor and  $\alpha_A$  is defined by the following:

$$\alpha_A(w) = \frac{\alpha_A}{1 + \left(\frac{w}{w_A}\right)^2}. \quad (26)$$

The characteristic mean excitation frequency ( $w_A$ ) is given by:

$$\omega_A = \frac{4}{3} \frac{C_6^{AA}}{(\alpha_A)^2}, \quad (27)$$

where the dispersion coefficient is given by the Casimir–Polder equation.

## S2.6 Density-dependent Dispersion Correction

Finally, the dDsC scheme proposed by Steinmann et al. also considers the influence of the chemical environment.<sup>12,13</sup> In this approach, the vdW energy is based on the Becke et al. simplified exchange-hole dipole moment formalism,<sup>19</sup>

$$E_{energy}^{vdW} = - \sum_{A=2}^{N_{At}} \sum_{B=1}^{A-1} \sum_{n=3}^{n=5} f_{2n}(bR_{AB}) \frac{C_{2n}^{AB}}{R_{AB}^{2n}}. \quad (28)$$

The dDsC correction is calculated using Equation 28 only when  $n$  is truncated in 3; otherwise, the dDsC10 scheme is used. The universal damping function  $f_{2n}$  is given by the following equation,

$$f_{2n}(x) = 1 - \exp(-x) \sum_{k=0}^{2n} \frac{x^k}{k!}. \quad (29)$$

The parameter  $b$  is the Tang and Tonnies (TT) damping factor:<sup>20</sup>

$$b(x) = F(x)b_{AB,asym}, \quad (30)$$

where  $b_{AB,asym}$  is obtained by the following combination rule:

$$b_{AB,asym} = 2 \frac{b_{AA,asym}b_{BB,asym}}{b_{AA,asym} + b_{BB,asym}}. \quad (31)$$

The parameter  $b_{AB,asym}$  can be estimated based on ionization energies or polarizabilities. In

the dDsC scheme, the polarizabilities are considered, then,

$$b_{AB,asym} = b_0 \sqrt[3]{\frac{1}{\alpha_i}}, \quad (32)$$

in which  $\alpha_i$  is defined in Equation 15 and  $b_0$  is a parameter related to the strength of the correction in the medium range. Furthermore,  $F(x)$  is given by,

$$F(X) = \frac{2}{e^{a_0x} + 1}, \quad (33)$$

where  $a_0$  is a fitted parameter that controls short-range behavior, while  $x$  is the damping argument defined by:

$$x = \left( 2q_{AB} + \frac{abs((Z_A - N_A^D)(Z_B - N_B^D))}{r_{AB}} \right) \frac{N_A^D + N_B^D}{N_A^D N_B^D}, \quad (34)$$

in which  $Z_A$  denotes the nuclear charge,  $N_A^D$  is the Hirshfeld dominantion population, and the term  $2q_{AB} = q_{AA} + q_{AB}$  denotes a covalent band index based on the overlap of conventional Hirshfeld populations:

$$q_{AB} = \int w_A(\mathbf{r})w_B(\mathbf{r})\rho(\mathbf{r})dw_i(\mathbf{r}). \quad (35)$$

### S3 Technical Details of the PAW Projectors

Table S1: Computational details on PAW projectors: recommended minimum and maximum cutoff energies, ENMIN (eV) and ENMAX (eV), respectively; and number of valence electrons, ZVAL.

| Element | PAW projector    | ENMIN   | ENMAX   | ZVAL | Valence electrons |
|---------|------------------|---------|---------|------|-------------------|
| Cu      | PAW_PBE Cu_Gw    | 312.779 | 417.039 | 11   | $3d^{10}4s^1$     |
| C       | PAW_PBE C_GW_new | 310.494 | 413.992 | 4    | $2s^22p^2$        |
| H       | PAW_PBE H_GW     | 250.000 | 300.000 | 1    | $1s^1$            |
| O       | PAW_PBE O_GW_new | 325.824 | 434.431 | 6    | $2s^22p^4$        |

## S4 Computational Convergence Tests

Table S2: Computational convergence of bulk properties of Cu in the face-centered cubic structure as a function of the plane-wave cutoff energy (ENCUT) and the  $\mathbf{k}$ -mesh: Equilibrium lattice constant, as defined in Figure S3, ( $a_0$ ), deviation of the lattice constant parameter in relation to the values calculated using the highest ENCUT or  $\mathbf{k}$ -mesh of each convergence test set ( $\Delta a_0 = 100(a_0^i - a_0^{ref})/a_0^{ref}$ ), total energy ( $E_{tot}$ ), deviation in relation to values calculated using the highest ENCUT or  $\mathbf{k}$ -mesh of each convergence test set ( $\Delta E_{tot} = (E_{tot}^i - E_{tot}^{ref})$ ).

| DFT                | ENCUT<br>(eV) | $\mathbf{k}$ -mesh | Number of<br>$\mathbf{k}$ -points | $a_0$<br>(Å) | $\Delta a_0$<br>(%) | $E_{tot}$<br>(eV) | $\Delta E_{tot}$<br>(meV) |
|--------------------|---------------|--------------------|-----------------------------------|--------------|---------------------|-------------------|---------------------------|
| PBE                | 417.039       | 14×14×14           | 104                               | 3.585        | -1.226              | -3.744442         | 3.223                     |
|                    | 521.298       | 14×14×14           | 104                               | 3.623        | -0.170              | -3.755894         | -8.229                    |
|                    | 625.558       | 14×14×14           | 104                               | 3.621        | -0.249              | -3.748312         | -0.647                    |
|                    | 729.818       | 14×14×14           | 104                               | 3.630        | 0.003               | -3.747932         | -0.266                    |
|                    | 834.078       | 14×14×14           | 104                               | 3.630        | 0.004               | -3.747985         | -0.320                    |
|                    | 938.337       | 14×14×14           | 104                               | 3.630        | 0.000               | -3.747665         | 0.000                     |
|                    | 834.078       | 5×5×5              | 10                                | 3.625        | -0.186              | -3.845642         | -96.744                   |
|                    | 834.078       | 7×7×7              | 20                                | 3.629        | -0.064              | -3.787536         | -38.638                   |
|                    | 834.078       | 10×10×10           | 47                                | 3.633        | 0.050               | -3.733210         | 15.688                    |
|                    | 834.078       | 12×12×12           | 72                                | 3.630        | -0.042              | -3.743989         | 4.909                     |
| 834.078            | 14×14×14      | 104                | 3.630                             | -0.044       | -3.747985           | 0.913             |                           |
| 834.078            | 17×17×17      | 165                | 3.629                             | -0.071       | -3.746145           | 2.752             |                           |
| 834.078            | 19×19×19      | 220                | 3.629                             | -0.054       | -3.745342           | 3.556             |                           |
| 834.078            | 21×21×21      | 286                | 3.630                             | -0.040       | -3.745653           | 3.245             |                           |
| 834.078            | 24×24×24      | 413                | 3.631                             | 0.000        | -3.748898           | 0.000             |                           |
| PBE<br>+<br>TS+SCS | 417.039       | 14×14×14           | 120                               | 3.559        | -1.184              | -4.100245         | 3.675                     |
|                    | 521.298       | 14×14×14           | 104                               | 3.597        | -0.133              | -4.112376         | -8.456                    |
|                    | 625.558       | 14×14×14           | 104                               | 3.594        | -0.210              | -4.104671         | -0.751                    |
|                    | 729.818       | 14×14×14           | 104                               | 3.602        | 0.029               | -4.104213         | -0.293                    |
|                    | 834.078       | 14×14×14           | 104                               | 3.604        | 0.066               | -4.104262         | 0.342                     |
|                    | 938.337       | 14×14×14           | 104                               | 3.601        | 0.000               | -4.103920         | 0.000                     |
|                    | 834.078       | 5×5×5              | 10                                | 3.597        | -0.162              | -4.202754         | -97.551                   |
|                    | 834.078       | 7×7×7              | 20                                | 3.602        | -0.038              | -4.144004         | -38.801                   |
|                    | 834.078       | 10×10×10           | 47                                | 3.605        | 0.059               | -4.089009         | 16.194                    |
|                    | 834.078       | 12×12×12           | 72                                | 3.602        | -0.022              | -4.100703         | 4.499                     |
| 834.078            | 14×14×14      | 104                | 3.604                             | 0.022        | -4.104262           | 0.940             |                           |
| 834.078            | 17×17×17      | 165                | 3.600                             | -0.073       | -4.102992           | 2.211             |                           |
| 834.078            | 19×19×19      | 220                | 3.602                             | -0.025       | -4.102058           | 3.145             |                           |
| 834.078            | 21×21×21      | 328                | 3.603                             | 0.001        | -4.105345           | -0.142            |                           |
| 834.078            | 24×24×24      | 413                | 3.603                             | 0.000        | -4.105203           | 0.000             |                           |

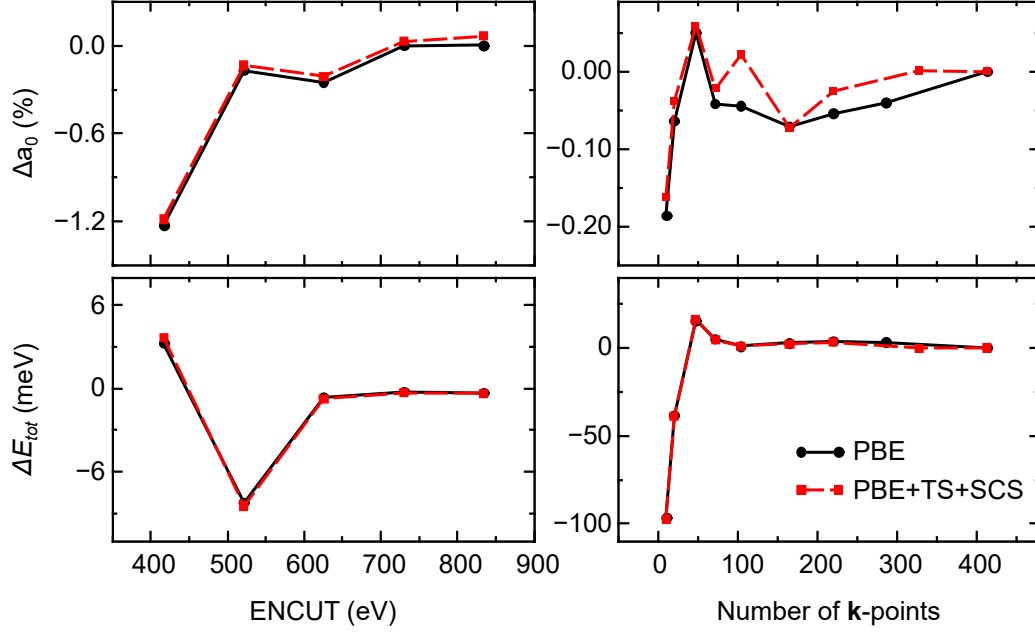

Figure S1: Computational convergence of the equilibrium lattice constant parameter ( $a_0$ ) and total energy ( $E_{tot}$ ) as a function of the plane-wave cutoff energy (ENCUT) and the number of  $\mathbf{k}$ -points in the irreducible part of the Brillouin zone.

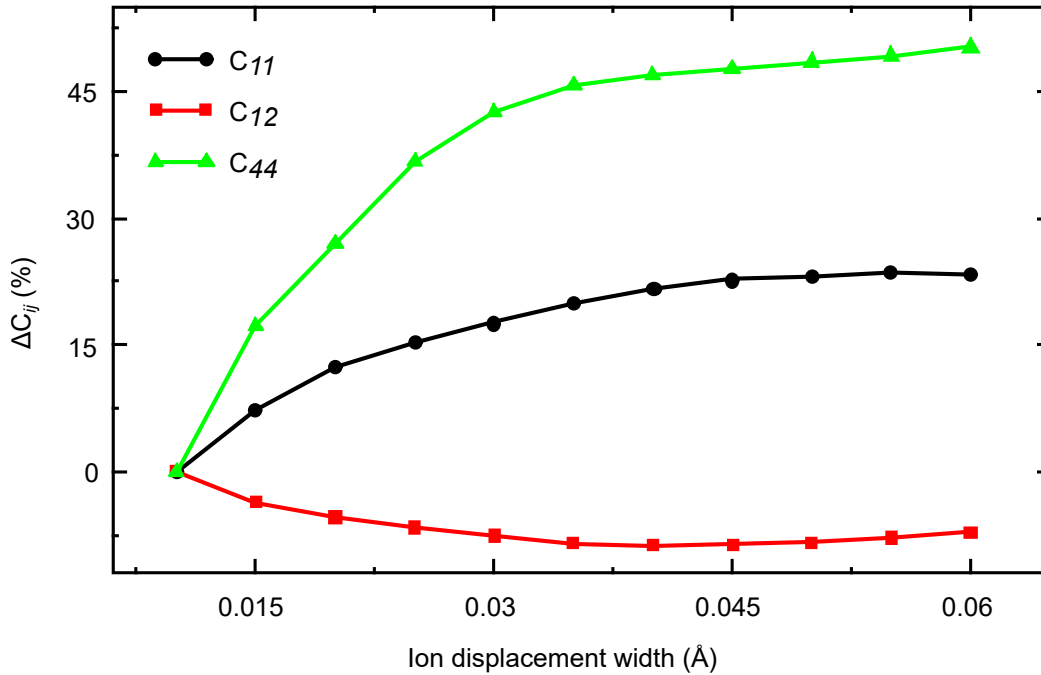

Figure S2: Computational convergence of the bulk Cu elastic constants ( $C_{11}$ ,  $C_{12}$ , and  $C_{44}$ ) with respect to the ion displacement width. All  $\Delta C_{ij}$  values were calculated with respect to the elastic constant calculated using the smallest ion displacement width ( $0.010 \text{ \AA}$ ), i.e.,  $\Delta C_{ij} = 100(C_{ij}^k - C_{ij}^{ref})/C_{ij}^{ref}$ .

## S5 Equilibrium Bulk Properties

Table S3: Effect of the vdW corrections on the bulk properties of Cu in the face-centered cubic structure: Equilibrium lattice constant ( $a_0$ ), deviation from the value obtained with PBE in percentage ( $\Delta a_0 = 100(a_0^i - a_0^{\text{PBE}})/a_0^{\text{PBE}}$ ), total energy ( $E_{tot}$ ), deviation from the value obtained with PBE ( $\Delta E_{tot} = (E_{tot}^i - E_{tot}^{\text{PBE}})$ ), cohesion energy ( $E_{coh}$ ), deviation from the value obtained with PBE in percentage ( $\Delta E_{coh} = 100(E_{coh}^i - E_{coh}^{\text{PBE}})/E_{coh}^{\text{PBE}}$ ). All values were obtained using a cutoff energy of 834.078 eV and a density of  $\mathbf{k}$ -points of  $40 \text{ \AA}^{-3}$ .

| DFT        | $a_0$<br>( $\text{\AA}$ ) | $\Delta a_0$<br>(%) | $E_{tot}$<br>(eV) | $\Delta E_{tot}$<br>(eV) | $E_{coh}$<br>(eV)    | $\Delta E_{coh}$<br>(%) |
|------------|---------------------------|---------------------|-------------------|--------------------------|----------------------|-------------------------|
| PBE        | 3.630                     | 0.00                | -3.745342         | 0.00                     | -3.502               | 0.00                    |
| PBE+D2     | 3.565                     | -1.77               | -4.164016         | -0.42                    | -3.920               | 11.96                   |
| PBE+D3     | 3.563                     | -1.84               | -4.256797         | -0.51                    | -4.013               | 14.61                   |
| PBE+D3(BJ) | 3.563                     | -1.84               | -4.338104         | -0.59                    | -4.094               | 16.93                   |
| PBE+TS     | 3.542                     | -2.41               | -4.359018         | -0.61                    | -4.115               | 17.53                   |
| PBE+TS+SCS | 3.602                     | -0.76               | -4.102058         | -0.36                    | -3.858               | 10.19                   |
| PBE+TS+HI  | 3.544                     | -2.35               | -4.345918         | -0.60                    | -4.102               | 17.15                   |
| PBE+dDsC   | 3.590                     | -1.08               | -4.071484         | -0.33                    | -3.828               | 9.31                    |
| Expt.      | 3.615 <sup>21</sup>       | 0.40                | -                 | -                        | -3.480 <sup>22</sup> | 0.62                    |

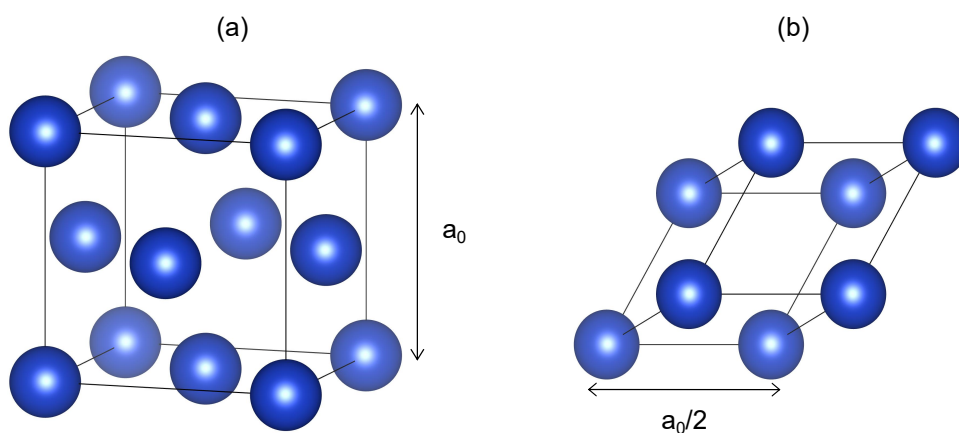

Figure S3: Molecular representation for the bulk Cu in the face-centered cubic structure: (a) conventional unit cell and (b) primitive cell. The lattice constant ( $a_0$ ) is indicated by the double arrow, while the dotted lines delimit the unit cells.

Table S4: Effect of the vdW corrections on the mechanical properties of bulk Cu in the face-centered cubic structure: Elastic constants ( $C_{ij}$ ), deviation from the value obtained with PBE in percentage ( $\Delta C_{ij} = 100(C_{ij}^k - C_{ij}^{\text{PBE}})/C_{ij}^{\text{PBE}}$ ), bulk modulus ( $B$ ), deviation from the value obtained with PBE in percentage ( $\Delta B = 100(B^k - B^{\text{PBE}})/B^{\text{PBE}}$ ), Young's modulus ( $E$ ), deviation from the value obtained with PBE in percentage ( $\Delta E = 100(E^k - E^{\text{PBE}})/E^{\text{PBE}}$ ), shear modulus ( $G$ ), and deviation from the value obtained with PBE in percentage ( $\Delta G = 100(G^k - G^{\text{PBE}})/G^{\text{PBE}}$ ).

| DFT        | $C_{11}$<br>(GPa)   | $\Delta C_{11}$<br>(%) | $C_{12}$<br>(GPa)   | $\Delta C_{12}$<br>(%) | $C_{44}$<br>(GPa)  | $\Delta C_{44}$<br>(%) | $B$<br>(GPa)         | $\Delta B$<br>(%) | $E$<br>(GPa)      | $\Delta E$<br>(%) | $G$<br>(GPa)       | $\Delta G$<br>(%) |
|------------|---------------------|------------------------|---------------------|------------------------|--------------------|------------------------|----------------------|-------------------|-------------------|-------------------|--------------------|-------------------|
| PBE        | 168.74              | 0.00                   | 125.10              | 0.00                   | 73.20              | 0.00                   | 139.65               | 0.00              | 140.32            | 0.00              | 52.65              | 0.00              |
| PBE+D2     | 180.88              | 7.19                   | 136.28              | 8.94                   | 83.62              | 14.22                  | 151.15               | 8.23              | 156.83            | 11.77             | 59.09              | 12.23             |
| PBE+D3     | 203.82              | 20.79                  | 141.43              | 13.05                  | 87.21              | 19.14                  | 162.23               | 16.17             | 171.57            | 22.27             | 64.81              | 23.10             |
| PBE+D3(BJ) | 200.98              | 19.10                  | 147.56              | 17.95                  | 93.35              | 27.51                  | 165.37               | 18.42             | 176.37            | 25.69             | 66.69              | 26.67             |
| PBE+TS     | 206.31              | 22.26                  | 156.26              | 24.90                  | 101.42             | 38.54                  | 172.94               | 23.84             | 187.04            | 33.30             | 70.86              | 34.59             |
| PBE+TS+SCS | 164.08              | -2.76                  | 145.28              | 16.13                  | 69.18              | -5.50                  | 151.54               | 8.51              | 123.51            | -11.98            | 45.27              | -14.02            |
| PBE+TS+HI  | 209.18              | 23.96                  | 158.46              | 26.66                  | 103.64             | 41.57                  | 175.37               | 25.58             | 190.75            | 35.94             | 72.33              | 37.38             |
| PBE+dDsC   | 190.00              | 12.60                  | 141.18              | 12.85                  | 84.50              | 15.43                  | 157.45               | 12.75             | 160.81            | 14.60             | 60.46              | 14.83             |
| Expt.      | 168.3 <sup>23</sup> | -0.26                  | 122.1 <sup>23</sup> | -2.40                  | 75.7 <sup>23</sup> | 3.41                   | 142.06 <sup>24</sup> | 1.73              | 130 <sup>24</sup> | -7.35             | 47.9 <sup>25</sup> | -9.02             |

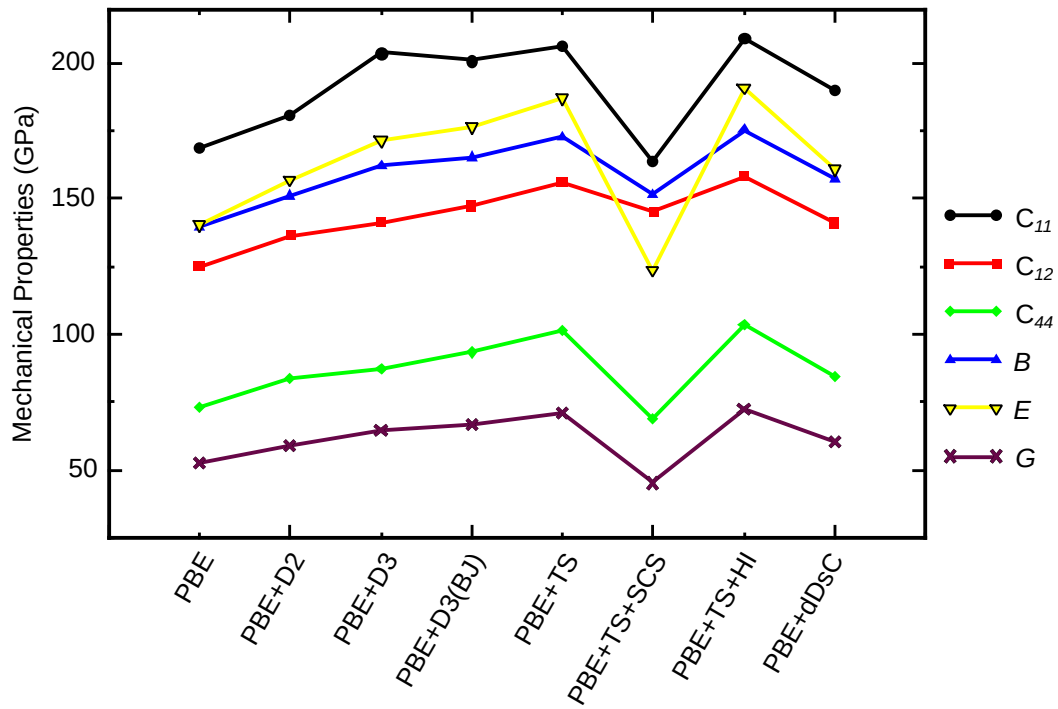

Figure S4: Effect of the vdW corrections on the mechanical properties of bulk Cu in the face-centered cubic structure: elastic constants ( $C_{11}$ ,  $C_{12}$ ,  $C_{44}$ ), bulk modulus ( $B$ ), Young's modulus ( $E$ ), and shear modulus ( $G$ ).

## S6 Clean Surface Properties

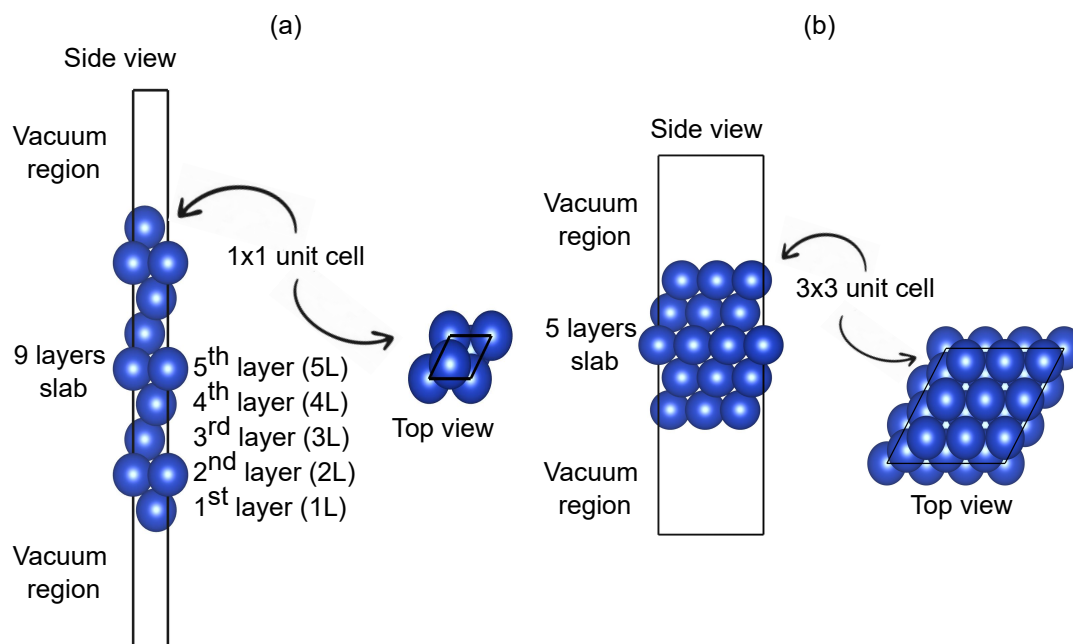

Figure S5: Molecular representation for the slab models: (a) Slab model used to evaluate the properties of the Cu(111) clean surface using a  $1 \times 1$  surface unit cell with 9 layers in the slab, (b) slab model used to study the adsorption the properties of molecules on the Cu(111) surface using a  $3 \times 3$  surface unit cell with 5 layers in the slab.

Table S5: Effect of the vdW corrections on the clean-surface properties of the Cu(111) surface: Surface energy per atom ( $\sigma$ ), surface energy per area ( $\gamma$ ), deviation from the value obtained with PBE in percentage ( $\Delta\gamma = 100(\gamma^i - \gamma^{\text{PBE}})/\sigma^{\text{PBE}}$ ), work function ( $\Phi$ ), deviation from the value obtained with PBE in percentage ( $\Delta\Phi = 100(\Phi^i - \Phi^{\text{PBE}})/\Phi^{\text{PBE}}$ ).

| DFT        | $\sigma^*$<br>(eV/atom) | $\gamma^*$<br>(J/m <sup>2</sup> ) | $\Delta\gamma$<br>(%) | $\Phi^\dagger$<br>(eV) | $\Delta\Phi$<br>(%) |
|------------|-------------------------|-----------------------------------|-----------------------|------------------------|---------------------|
| PBE        | 0.462                   | 1.298                             | 0.00                  | 4.805                  | 0.00                |
| PBE+D2     | 0.686                   | 1.997                             | 53.84                 | 4.843                  | 0.78                |
| PBE+D3     | 0.763                   | 2.225                             | 71.34                 | 4.854                  | 1.01                |
| PBE+D3(BJ) | 0.765                   | 2.231                             | 71.85                 | 4.849                  | 0.92                |
| PBE+TS     | 0.868                   | 2.559                             | 97.10                 | 4.857                  | 1.07                |
| PBE+TS+SCS | 0.313                   | 0.892                             | -31.34                | 4.806                  | 0.02                |
| PBE+TS+HI  | 0.857                   | 2.526                             | 94.52                 | 4.862                  | 1.19                |
| PBE+dDsC   | 0.633                   | 1.817                             | 39.97                 | 4.815                  | 0.21                |
| Expt.      | -                       | 1.825 <sup>26</sup>               | 40.56                 | 4.98 <sup>27</sup>     | 3.64                |

\*  $\sigma = \frac{1}{2N_{tot}}(E_{tot}^{\text{slab}} - N_l E_{tot}^{\text{bulk}})$  and  $\gamma = \frac{1}{2A}(E_{tot}^{\text{slab}} - N_l E_{tot}^{\text{bulk}})$ , where  $E_{tot}^{\text{slab}}$  is the slab total energy,  $E_{tot}^{\text{bulk}}$  the bulk total energy,  $N_l$  is the number of layers in the slab,  $N_{tot}$  is the total number of atoms in the slab, and  $A$  is the slab area.

†  $\Phi = V_{es}(\mathbf{r}_{vac}) - E_{\text{Fermi}}$ , where  $V_{es}(\mathbf{r}_{vac})$  is the electrostatic potential in vacuum and  $E_{\text{Fermi}}$  the Fermi level.

Table S6: Effect of the vdW corrections on the clean surface properties of the Cu(111) surface: Change in the interlayer spacing upon structure optimization ( $d_{ij}$ ), deviation from the value obtained with PBE in percentage ( $\Delta d_{ij} = 100(\Delta d_{ij}^k - \Delta d_{ij}^{\text{PBE}})/\Delta d_{ij}^{\text{PBE}}$ ), and change in the slab volume upon structure optimization ( $\Delta V$ ).

| DFT        | $\Delta d_{12}$<br>(%) | $\Delta d_{12}$<br>(%) | $\Delta d_{23}$<br>(%) | $\Delta d_{23}$<br>(%) | $\Delta d_{34}$<br>(%) | $\Delta d_{34}$<br>(%) | $\Delta d_{45}$<br>(%) | $\Delta d_{45}$<br>(%) | $\Delta V$<br>(%) |
|------------|------------------------|------------------------|------------------------|------------------------|------------------------|------------------------|------------------------|------------------------|-------------------|
| PBE        | -0.901                 | 0.00                   | -0.293                 | 0.00                   | 0.076                  | 0.00                   | 0.278                  | 0.00                   | -0.210            |
| PBE+D2     | 0.442                  | -149.02                | -0.192                 | -34.43                 | -0.136                 | -279.04                | 0.105                  | -62.11                 | 0.055             |
| PBE+D3     | 1.003                  | -211.36                | -0.083                 | -71.61                 | -0.248                 | -427.81                | 0.020                  | -92.72                 | 0.173             |
| PBE+D3(BJ) | 0.667                  | -174.02                | -0.092                 | -68.73                 | -0.197                 | -360.37                | 0.063                  | -77.27                 | 0.110             |
| PBE+TS     | 1.579                  | -275.32                | -0.006                 | -97.81                 | -0.288                 | -480.28                | -0.089                 | -132.13                | 0.299             |
| PBE+TS+SCS | -1.155                 | 28.20                  | -2.267                 | 673.69                 | -2.396                 | -3265.28               | -2.433                 | -975.71                | -2.062            |
| PBE+TS+HI  | 1.478                  | -264.14                | -0.007                 | -97.72                 | -0.266                 | -451.01                | -0.067                 | -124.08                | 0.285             |
| PBE+dDsC   | -0.038                 | -95.82                 | -0.046                 | -84.45                 | -0.051                 | -167.24                | 0.099                  | -64.46                 | -0.009            |



Table S7: Effect of the vdW corrections on the  $d$ -band center ( $\epsilon_d^i$ ) for each layer  $i$  in the Cu(111) clean surface model. Values of percentage deviation ( $\Delta\epsilon_d^i$ ) were calculated with respect to the value obtained with PBE.

| DFT        | $\epsilon_d^1$<br>(eV) | $\Delta\epsilon_d^1$<br>(%) | $\epsilon_d^2$<br>(eV) | $\Delta\epsilon_d^2$<br>(%) | $\epsilon_d^3$<br>(eV) | $\Delta\epsilon_d^3$<br>(%) | $\epsilon_d^4$<br>(eV) | $\Delta\epsilon_d^4$<br>(%) | $\epsilon_d^5$<br>(eV) | $\Delta\epsilon_d^5$<br>(%) |
|------------|------------------------|-----------------------------|------------------------|-----------------------------|------------------------|-----------------------------|------------------------|-----------------------------|------------------------|-----------------------------|
| PBE        | -2.463                 | 0.000                       | -2.768                 | 0.000                       | -2.760                 | 0.000                       | -2.761                 | 0.000                       | -2.775                 | 0.000                       |
| PBE+D2     | -2.563                 | 4.031                       | -2.905                 | 4.938                       | -2.918                 | 5.739                       | -2.924                 | 5.904                       | -2.939                 | 5.907                       |
| PBE+D3     | -2.556                 | 3.751                       | -2.900                 | 4.754                       | -2.922                 | 5.870                       | -2.931                 | 6.158                       | -2.946                 | 6.163                       |
| PBE+D3(BJ) | -2.563                 | 4.056                       | -2.906                 | 4.993                       | -2.923                 | 5.917                       | -2.931                 | 6.169                       | -2.946                 | 6.170                       |
| PBE+TS     | -2.589                 | 5.099                       | -2.944                 | 6.358                       | -2.976                 | 7.822                       | -2.988                 | 8.229                       | -3.004                 | 8.260                       |
| PBE+TS+SCS | -2.502                 | 1.567                       | -2.846                 | 2.829                       | -2.891                 | 4.750                       | -2.907                 | 5.292                       | -2.913                 | 4.966                       |
| PBE+TS+HI  | -2.587                 | 5.018                       | -2.940                 | 6.196                       | -2.970                 | 7.594                       | -2.982                 | 7.994                       | -2.998                 | 8.030                       |
| PBE+dDsC   | -2.527                 | 2.602                       | -2.850                 | 2.966                       | -2.852                 | 3.341                       | -2.859                 | 3.550                       | -2.876                 | 3.644                       |

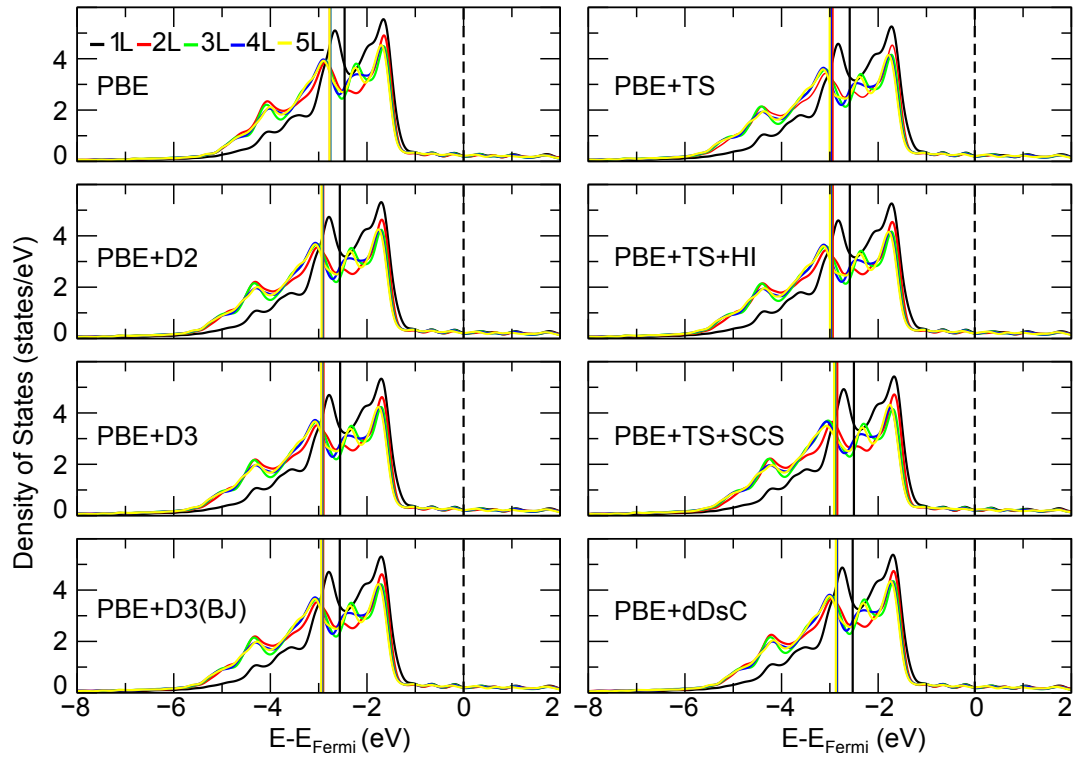

Figure S6: Density of states for the first five layers in the Cu(111) slab. The dashed line represents the Fermi level, while the vertical colored solid lines represent the  $d$ -band center for each corresponding layer.

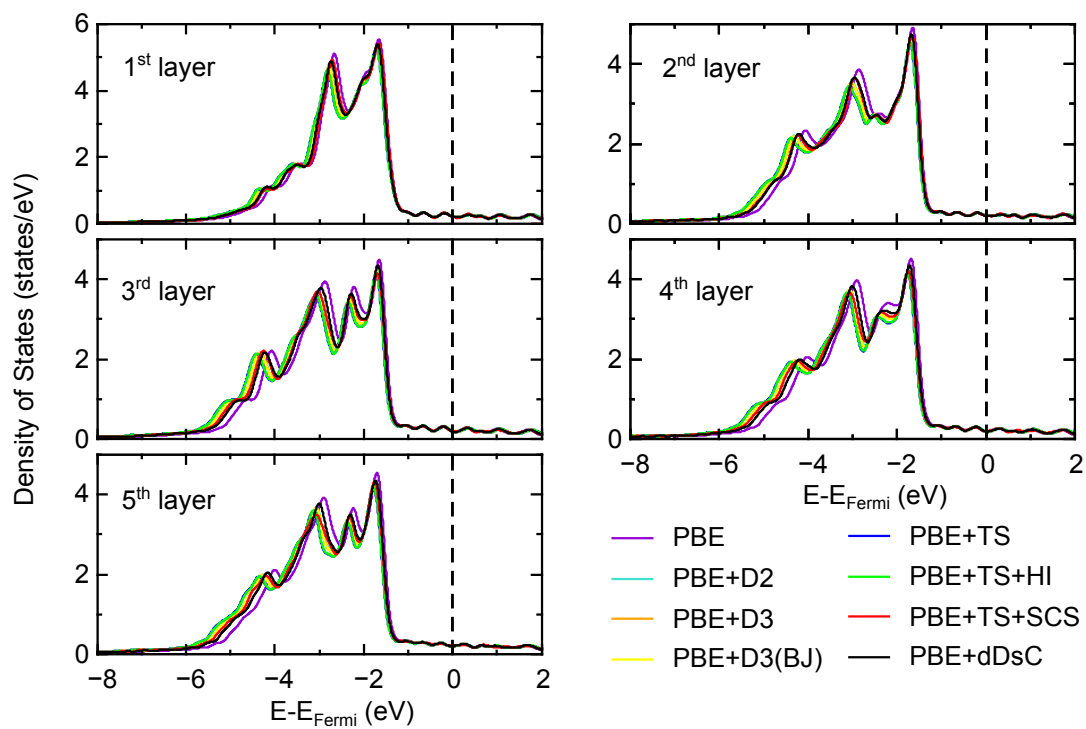

Figure S7: Effect of the vdW corrections on the density of states for the first five layers of the Cu(111) slab. Colored solid lines indicate the vdW corrections considered in this study.

## S7 Gas-phase Molecules

Table S8: Effect of the vdW corrections on the properties of gas-phase molecules: Average bond length ( $d_b$ ), average bond angle ( $\alpha$ ), bond energy ( $E_b$ ), and energy difference between the HOMO and the LUMO orbitals ( $E_g$ ). Experimental data available in Ref. 28.

| Property     | DFT        | CH <sub>3</sub> | CH <sub>4</sub> | CO     | CO <sub>2</sub> | H <sub>2</sub> O | OH    |
|--------------|------------|-----------------|-----------------|--------|-----------------|------------------|-------|
| $d_b$ (Å)    | PBE        | 1.087           | 1.097           | 1.138  | 1.173           | 0.971            | 0.985 |
|              | PBE+D2     | 1.089           | 1.098           | 1.138  | 1.173           | 0.971            | 0.985 |
|              | PBE+D3     | 1.088           | 1.097           | 1.138  | 1.173           | 0.971            | 0.985 |
|              | PBE+D3(BJ) | 1.087           | 1.097           | 1.138  | 1.173           | 0.971            | 0.985 |
|              | PBE+TS     | 1.087           | 1.097           | 1.138  | 1.173           | 0.971            | 0.985 |
|              | PBE+TS+SCS | 1.087           | 1.097           | 1.138  | 1.173           | 0.971            | 0.985 |
|              | PBE+TS+HI  | 1.087           | 1.097           | 1.138  | 1.173           | 0.971            | 0.985 |
|              | PBE+dDsC   | 1.088           | 1.097           | 1.138  | 1.173           | 0.971            | 0.985 |
|              | Expt.      | 1.079           | 1.087           | 1.128  | 1.162           | 0.958            | 0.97  |
| $\alpha$ (°) | PBE        | 120.0           | 109.5           | -      | 180.0           | 104.1            | -     |
|              | PBE+D2     | 120.0           | 109.5           | -      | 180.0           | 104.1            | -     |
|              | PBE+D3     | 120.0           | 109.5           | -      | 180.0           | 104.1            | -     |
|              | PBE+D3(BJ) | 120.0           | 109.5           | -      | 180.0           | 104.1            | -     |
|              | PBE+TS     | 120.0           | 109.5           | -      | 180.0           | 104.1            | -     |
|              | PBE+TS+SCS | 120.0           | 109.5           | -      | 180.0           | 104.1            | -     |
|              | PBE+TS+HI  | 120.0           | 109.5           | -      | 180.0           | 104.1            | -     |
|              | PBE+dDsC   | 120.0           | 109.5           | -      | 180.0           | 104.1            | -     |
|              | Expt.      | 120.0           | 109.5           | -      | 180.0           | 104.5            | -     |
| $E_b$ (eV)   | PBE        | -13.42          | -18.18          | -11.63 | -17.99          | -10.13           | -4.75 |
|              | PBE+D2     | -13.43          | -18.20          | -11.63 | -18.00          | -10.13           | -4.75 |
|              | PBE+D3     | -13.42          | -18.18          | -11.63 | -18.00          | -10.13           | -4.75 |
|              | PBE+D3(BJ) | -13.44          | -18.21          | -11.64 | -18.02          | -10.14           | -4.76 |
|              | PBE+TS     | -13.42          | -18.18          | -11.63 | -17.99          | -10.13           | -4.75 |
|              | PBE+TS+SCS | -13.42          | -18.18          | -11.63 | -17.99          | -10.13           | -4.75 |
|              | PBE+TS+HI  | -13.42          | -18.18          | -11.63 | -17.99          | -10.13           | -4.75 |
|              | PBE+dDsC   | -13.42          | -18.18          | -11.63 | -18.01          | -10.13           | -4.75 |
|              | Expt.      | -12.53          | -17.02          | -11.11 | -16.56          | -9.51            | -4.41 |
| $E_g$ (eV)   | PBE        | 4.93            | 8.98            | 6.96   | 8.08            | 6.23             | 6.50  |
|              | PBE+D2     | 4.93            | 8.97            | 6.96   | 8.08            | 6.23             | 6.50  |
|              | PBE+D3     | 4.93            | 8.98            | 6.96   | 8.08            | 6.23             | 6.50  |
|              | PBE+D3(BJ) | 4.93            | 8.98            | 6.96   | 8.08            | 6.23             | 6.50  |
|              | PBE+TS     | 4.93            | 8.98            | 6.96   | 8.08            | 6.23             | 6.50  |
|              | PBE+TS+SCS | 4.93            | 8.98            | 6.96   | 8.08            | 6.23             | 6.50  |
|              | PBE+TS+HI  | 4.93            | 8.98            | 6.96   | 8.08            | 6.23             | 6.50  |
|              | PBE+dDsC   | 4.93            | 8.98            | 6.96   | 8.08            | 6.23             | 6.50  |

# S8 Adsorption Properties of Molecules on the Cu(111)

## Surface

Table S9: Effect of the vdW corrections on the properties of adsorbed systems. Distance between the Cu surface and the molecule ( $d_{Mol-Cu}$ ), molecular bond length and its percentage deviation from gas-phase values ( $d_b$ ) and ( $\Delta d_b$ ), average bond angle and its percentage deviation from gas-phase values ( $\alpha$ ,  $\Delta\alpha$ ), and the adsorption energy ( $E_{ad}$ ).

| Molecule        | DFT      | Site       | $d_{Mol-Cu}$<br>(Å) | $d_b$<br>(Å) | $\Delta d_b$<br>(%) | $\alpha$<br>(°) | $\Delta\alpha$<br>(%) | $E_{ad}$<br>(eV) |
|-----------------|----------|------------|---------------------|--------------|---------------------|-----------------|-----------------------|------------------|
| CH <sub>3</sub> | PBE      | Bridge     | 1.791               | 1.107        | 1.82                | 105.9           | -11.71                | -1.515           |
|                 |          | Hollow fcc | 1.769               | 1.108        | 1.85                | 105.8           | -11.82                | -1.526           |
|                 |          | Hollow hcp | 1.753               | 1.108        | 1.85                | 105.9           | -11.72                | -1.519           |
|                 |          | Top        | 2.189               | 1.097        | 0.92                | 109.6           | -8.65                 | -1.349           |
|                 |          | Top*       | 2.158               | 1.098        | 0.95                | 109.5           | -8.78                 | -1.350           |
|                 | PBE+D3   | Bridge     | 1.876               | 1.103        | 1.38                | 107.2           | -10.68                | -1.802           |
|                 |          | Hollow fcc | 1.742               | 1.106        | 1.74                | 106.2           | -11.52                | -1.917           |
|                 |          | Hollow hcp | 1.727               | 1.106        | 1.74                | 106.4           | -11.35                | -1.908           |
|                 |          | Top        | 2.109               | 1.097        | 0.89                | 109.9           | -8.38                 | -1.702           |
|                 |          | Top*       | 2.079               | 1.098        | 1.00                | 109.4           | -8.87                 | -1.713           |
|                 | PBE+dDsC | Bridge     | 1.892               | 1.103        | 1.39                | 107.1           | -10.78                | -1.618           |
|                 |          | Hollow fcc | 1.780               | 1.103        | 1.39                | 107.0           | -10.81                | -1.642           |
|                 |          | Hollow hcp | 1.746               | 1.107        | 1.79                | 106.1           | -11.59                | -1.708           |
|                 |          | Top        | 2.113               | 1.097        | 0.87                | 109.7           | -8.58                 | -1.533           |
|                 |          | Top*       | 2.095               | 1.098        | 0.94                | 109.4           | -8.84                 | -1.536           |
| CH <sub>4</sub> | PBE      | Bridge     | 3.359               | 1.097        | 0.00                | 109.5           | 0.00                  | 0.007            |
|                 |          | Hollow fcc | 3.340               | 1.097        | 0.00                | 109.5           | 0.00                  | 0.009            |
|                 |          | Hollow hcp | 3.369               | 1.097        | 0.00                | 109.5           | 0.00                  | 0.005            |
|                 |          | Top        | 3.374               | 1.097        | -0.01               | 109.5           | 0.00                  | 0.007            |
|                 |          | Top*       | 3.389               | 1.097        | -0.01               | 109.5           | 0.00                  | 0.005            |
|                 | PBE+D3   | Bridge     | 3.079               | 1.098        | 0.08                | 109.5           | 0.00                  | -0.276           |
|                 |          | Hollow fcc | 3.244               | 1.098        | 0.04                | 109.5           | 0.00                  | -0.275           |
|                 |          | Hollow hcp | 3.032               | 1.098        | 0.09                | 109.5           | 0.00                  | -0.272           |
|                 |          | Top        | 3.053               | 1.098        | 0.07                | 109.5           | 0.00                  | -0.267           |
|                 |          | Top*       | 3.066               | 1.098        | 0.05                | 109.5           | 0.00                  | -0.268           |
|                 | PBE+dDsC | Bridge     | 3.139               | 1.098        | 0.05                | 109.5           | 0.00                  | -0.159           |
|                 |          | Hollow fcc | 3.134               | 1.098        | 0.04                | 109.5           | 0.00                  | -0.157           |
|                 |          | Hollow hcp | 3.137               | 1.098        | 0.06                | 109.5           | 0.00                  | -0.163           |
|                 |          | Top        | 3.149               | 1.098        | 0.03                | 109.5           | 0.00                  | -0.157           |
|                 |          | Top*       | 3.133               | 1.098        | 0.04                | 109.5           | 0.00                  | -0.154           |
| CO              | PBE      | Bridge     | 1.556               | 1.171        | 2.85                | -               | -                     | -0.854           |
|                 |          | Hollow fcc | 1.482               | 1.178        | 3.47                | -               | -                     | -0.935           |
|                 |          | Hollow hcp | 1.476               | 1.177        | 3.45                | -               | -                     | -0.894           |

Continue on next page

Table S9: Continued from previous page.

| Molecule         | DFT             | Site       | $d_{Mol-Cu}$<br>(Å) | $d_b$<br>(Å) | $\Delta d_b$<br>(%) | $\alpha$<br>(°) | $\Delta\alpha$<br>(%) | $E_{ad}$<br>(eV) |        |
|------------------|-----------------|------------|---------------------|--------------|---------------------|-----------------|-----------------------|------------------|--------|
|                  | PBE+D3          | Top        | 1.959               | 1.152        | 1.19                | -               | -                     | -0.779           |        |
|                  |                 | Top*       | 1.795               | 1.157        | 1.64                | -               | -                     | -0.756           |        |
|                  |                 | Bridge     | 1.555               | 1.170        | 2.84                | -               | -                     | -1.062           |        |
|                  |                 | Hollow fcc | 1.492               | 1.177        | 3.38                | -               | -                     | -1.115           |        |
|                  |                 | Hollow hcp | 1.479               | 1.176        | 3.36                | -               | -                     | -1.074           |        |
|                  |                 | Top        | 1.945               | 1.152        | 1.19                | -               | -                     | -0.963           |        |
|                  | PBE+dDsC        | Top*       | 1.780               | 1.157        | 1.61                | -               | -                     | -0.958           |        |
|                  |                 | Bridge     | 1.496               | 1.171        | 1.61                | -               | -                     | -0.980           |        |
|                  |                 | Hollow fcc | 1.475               | 1.177        | 2.86                | -               | -                     | -1.056           |        |
|                  |                 | Hollow hcp | 1.468               | 1.177        | 3.43                | -               | -                     | -1.019           |        |
|                  |                 | Top        | 1.941               | 1.152        | 3.41                | -               | -                     | -0.900           |        |
|                  |                 | Top*       | 1.712               | 1.157        | 1.21                | -               | -                     | -0.877           |        |
|                  | CO <sub>2</sub> | PBE        | Bridge              | 3.426        | 1.173               | 0.03            | 179.9                 | -0.04            | -0.008 |
|                  |                 |            | Hollow fcc          | 3.443        | 1.173               | 0.03            | 179.9                 | -0.06            | -0.006 |
|                  |                 |            | Hollow hcp          | 3.448        | 1.173               | 0.03            | 179.9                 | -0.06            | -0.007 |
| Top              |                 |            | 3.546               | 1.173        | 0.03                | 179.9           | -0.06                 | -0.009           |        |
| Top*             |                 |            | 3.510               | 1.173        | 0.04                | 179.9           | -0.06                 | -0.006           |        |
| PBE+D3           |                 | Bridge     | 3.198               | 1.173        | 0.06                | 179.8           | -0.13                 | -0.229           |        |
|                  |                 | Hollow fcc | 3.196               | 1.173        | 0.06                | 179.8           | -0.12                 | -0.227           |        |
|                  |                 | Hollow hcp | 3.184               | 1.173        | 0.06                | 179.8           | -0.11                 | -0.228           |        |
|                  |                 | Top        | 3.240               | 1.173        | 0.06                | 179.7           | -0.14                 | -0.218           |        |
|                  |                 | Top*       | 3.220               | 1.173        | 0.07                | 179.7           | -0.13                 | -0.219           |        |
| PBE+dDsC         |                 | Bridge     | 3.180               | 1.173        | 0.03                | 179.8           | -0.11                 | -0.152           |        |
|                  |                 | Hollow fcc | 3.215               | 1.173        | 0.03                | 179.8           | -0.11                 | -0.150           |        |
|                  |                 | Hollow hcp | 3.305               | 1.173        | 0.03                | 179.8           | -0.10                 | -0.161           |        |
|                  |                 | Top        | 3.281               | 1.173        | 0.02                | 179.7           | -0.15                 | -0.145           |        |
|                  |                 | Top*       | 3.325               | 1.173        | 0.03                | 179.8           | -0.12                 | -0.151           |        |
| H <sub>2</sub> O | PBE             | Bridge     | 2.462               | 0.978        | 0.71                | 104.0           | -0.15                 | -0.175           |        |
|                  |                 | Hollow fcc | 2.744               | 0.976        | 0.51                | 103.6           | -0.52                 | -0.083           |        |
|                  |                 | Hollow hcp | 2.447               | 0.978        | 0.73                | 103.9           | -0.20                 | -0.172           |        |
|                  |                 | Top        | 2.399               | 0.978        | 0.72                | 104.3           | 0.21                  | -0.184           |        |
|                  |                 | Top*       | 2.463               | 0.977        | 0.61                | 104.6           | 0.47                  | -0.179           |        |
|                  | PBE+D3          | Bridge     | 2.326               | 0.979        | 0.85                | 103.8           | -0.30                 | -0.422           |        |
|                  |                 | Hollow fcc | 2.319               | 0.980        | 0.89                | 103.5           | -0.58                 | -0.423           |        |
|                  |                 | Hollow hcp | 2.317               | 0.979        | 0.87                | 103.7           | -0.38                 | -0.413           |        |
|                  |                 | Top        | 2.364               | 0.979        | 0.81                | 104.3           | 0.15                  | -0.427           |        |
|                  |                 | Top*       | 2.330               | 0.978        | 0.73                | 104.5           | 0.32                  | -0.424           |        |
|                  | PBE+dDsC        | Bridge     | 2.308               | 0.979        | 0.80                | 103.9           | -0.19                 | -0.317           |        |
|                  |                 | Hollow fcc | 2.300               | 0.979        | 0.83                | 103.8           | -0.31                 | -0.317           |        |
|                  |                 | Hollow hcp | 2.303               | 0.979        | 0.83                | 103.9           | -0.25                 | -0.304           |        |
|                  |                 | Top        | 2.360               | 0.978        | 0.71                | 104.4           | 0.24                  | -0.325           |        |

Continue on next page

Table S9: Continued from previous page.

| Molecule | DFT      | Site       | $d_{Mol-Cu}$<br>(Å) | $d_b$<br>(Å) | $\Delta d_b$<br>(%) | $\alpha$<br>(°) | $\Delta\alpha$<br>(%) | $E_{ad}$<br>(eV) |
|----------|----------|------------|---------------------|--------------|---------------------|-----------------|-----------------------|------------------|
|          |          | Top*       | 2.319               | 0.977        | 0.65                | 104.7           | 0.54                  | -0.328           |
| OH       | PBE      | Bridge     | 1.366               | 0.972        | -1.33               | -               | -                     | -3.088           |
|          |          | Hollow fcc | 1.364               | 0.972        | -1.31               | -               | -                     | -3.089           |
|          |          | Hollow hcp | 1.415               | 0.972        | -1.32               | -               | -                     | -3.009           |
|          |          | Top        | 1.897               | 0.966        | -1.98               | -               | -                     | -2.160           |
|          |          | Top*       | 1.982               | 0.975        | -1.08               | -               | -                     | -2.460           |
|          | PBE+D3   | Bridge     | 1.510               | 0.970        | -1.43               | -               | -                     | -2.983           |
|          |          | Hollow fcc | 1.399               | 0.971        | -1.41               | -               | -                     | -3.185           |
|          |          | Hollow hcp | 1.449               | 0.971        | -2.05               | -               | -                     | -3.116           |
|          |          | Top        | 1.875               | 0.965        | -1.08               | -               | -                     | -2.280           |
|          |          | Top*       | 1.951               | 0.975        | -1.18               | -               | -                     | -2.603           |
|          | PBE+dDsC | Bridge     | 1.481               | 0.974        | -1.18               | -               | -                     | -2.974           |
|          |          | Hollow fcc | 1.381               | 0.972        | -1.39               | -               | -                     | -3.124           |
|          |          | Hollow hcp | 1.428               | 0.971        | -1.41               | -               | -                     | -3.056           |
|          |          | Top        | 1.877               | 0.966        | -1.97               | -               | -                     | -2.229           |
|          |          | Top*       | 1.946               | 0.974        | -1.09               | -               | -                     | -2.517           |

Table S10: Effect of the vdW corrections on the properties of adsorbed systems: Work function ( $\Phi$ ), change in the work function ( $\Delta\Phi$ ), change in the Bader charge of the adsorbed molecule and the substrate, indicated by  $\Delta Q_{Mol}$  and  $\Delta Q_{Sub}$ , respectively.

| System           | PBE            |                      |                         |                         | PBE+D3         |                      |                         |                         | PBE+dDsC       |                      |                         |                         |
|------------------|----------------|----------------------|-------------------------|-------------------------|----------------|----------------------|-------------------------|-------------------------|----------------|----------------------|-------------------------|-------------------------|
|                  | $\Phi$<br>(eV) | $\Delta\Phi$<br>(eV) | $\Delta Q_{Mol}$<br>(e) | $\Delta Q_{Sub}$<br>(e) | $\Phi$<br>(eV) | $\Delta\Phi$<br>(eV) | $\Delta Q_{Mol}$<br>(e) | $\Delta Q_{Sub}$<br>(e) | $\Phi$<br>(eV) | $\Delta\Phi$<br>(eV) | $\Delta Q_{Mol}$<br>(e) | $\Delta Q_{Sub}$<br>(e) |
| CH <sub>3</sub>  | 4.24           | -0.57                | -0.34                   | 0.34                    | 4.24           | -0.62                | -0.33                   | 0.33                    | 4.36           | -0.46                | -0.30                   | 0.30                    |
| CH <sub>4</sub>  | 4.61           | -0.19                | -0.03                   | 0.03                    | 4.61           | -0.24                | -0.03                   | 0.03                    | 4.57           | -0.24                | -0.03                   | 0.03                    |
| CO               | 5.11           | 0.31                 | -0.36                   | 0.36                    | 5.16           | 0.30                 | -0.35                   | 0.35                    | 5.14           | 0.33                 | -0.35                   | 0.35                    |
| CO <sub>2</sub>  | 4.72           | -0.08                | -0.04                   | 0.04                    | 4.70           | -0.15                | -0.05                   | 0.05                    | 4.69           | -0.12                | -0.05                   | 0.05                    |
| OH               | 4.05           | -0.76                | -0.59                   | 0.59                    | 4.06           | -0.79                | -0.58                   | 0.58                    | 4.06           | -0.76                | -0.58                   | 0.58                    |
| H <sub>2</sub> O | 4.78           | -0.02                | -0.02                   | 0.02                    | 4.43           | -0.43                | 0.00                    | 0.00                    | 4.31           | -0.51                | 0.00                    | 0.00                    |

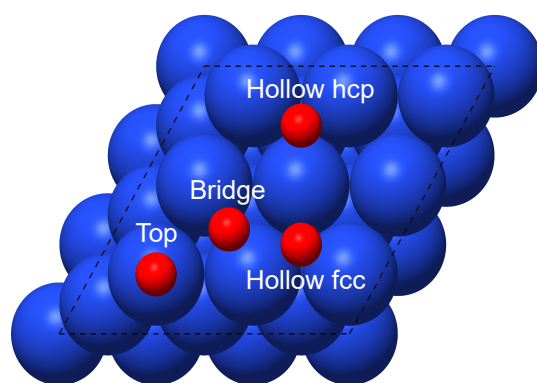

Figure S8: High symmetry adsorption sites (red spheres) on the Cu(111) surface. Blue spheres represent Cu atoms.

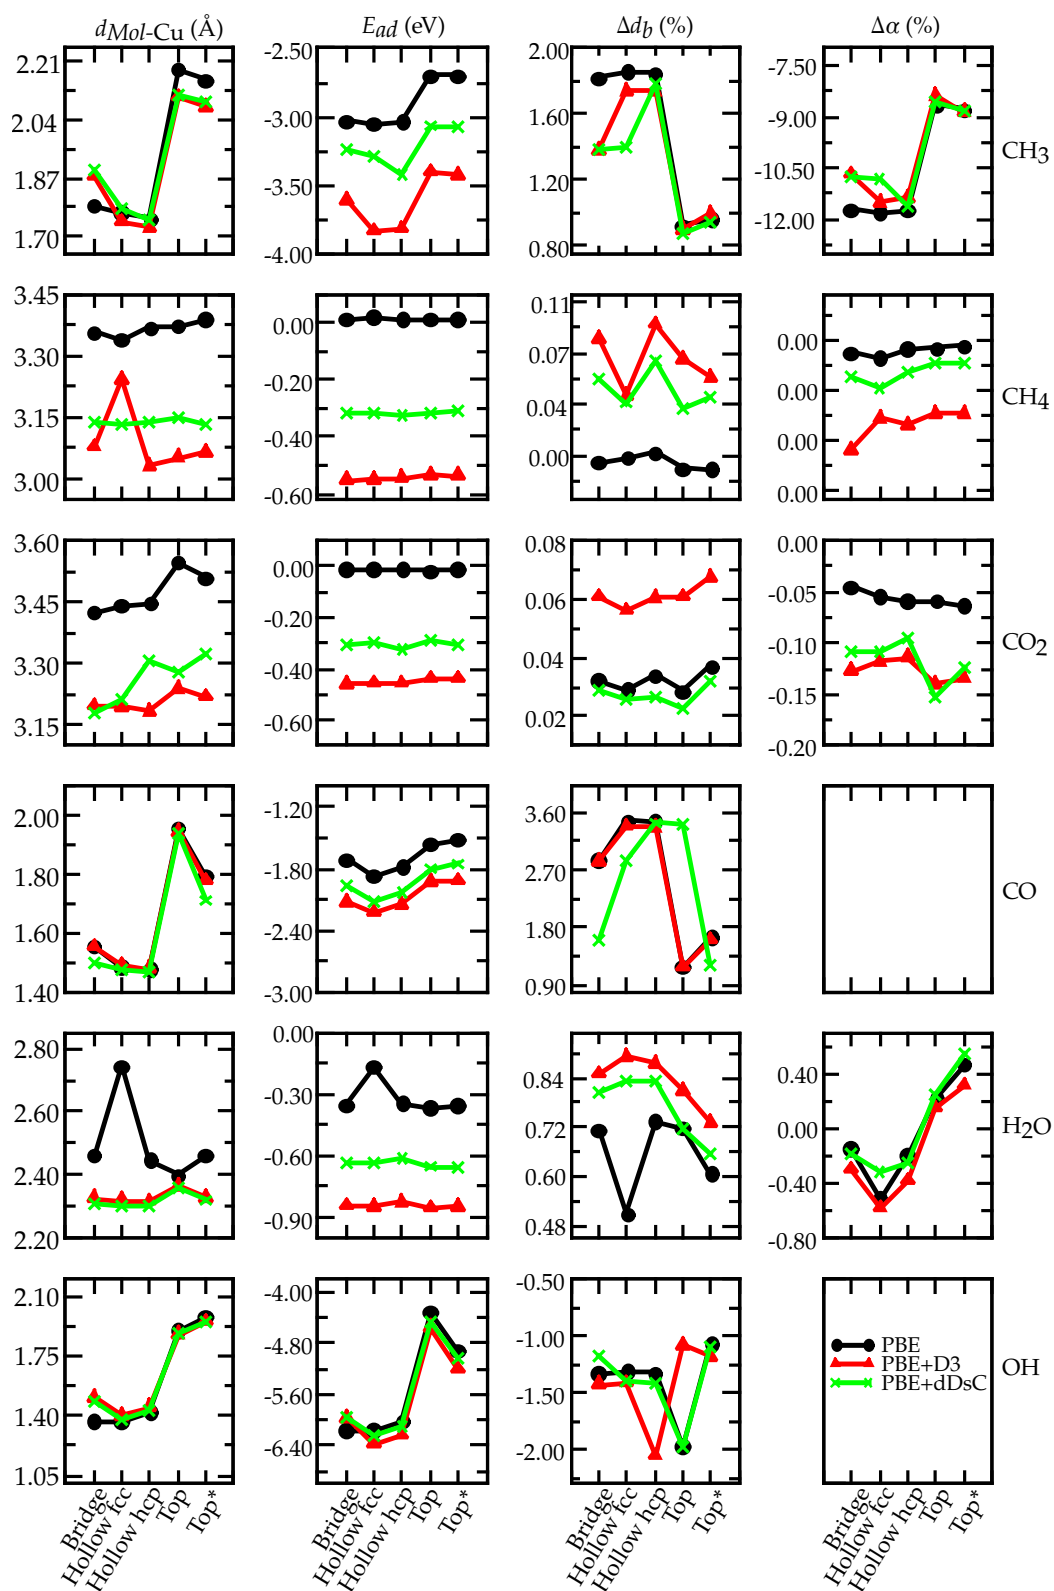

Figure S9: Effect of the vdW corrections on the adsorption properties of CH<sub>3</sub>, CH<sub>4</sub>, CO<sub>2</sub>, CO, CO<sub>2</sub>, OH and H<sub>2</sub>O on the Cu(111) surface adsorption sites.



## References

- 1 Hohenberg, P.; Kohn, W. Inhomogeneous Electron Gas. *Phys. Rev.* **1964**, *136*, B864–B871, DOI: 10.1103/physrev.136.b864.
- 2 Kohn, W.; Sham, L. J. Self-Consistent Equations Including Exchange and Correlation Effects. *Phys. Rev.* **1965**, *140*, A1133–A1138, DOI: 10.1103/physrev.140.a1133.
- 3 Klimeš, J.; Michaelides, A. Perspective: Advances and Challenges in Treating van der Waals Dispersion Forces in Density Functional Theory. *J. Chem. Phys.* **2012**, *137*, 120901, DOI: 10.1063/1.4754130.
- 4 Grimme, S. Semiempirical GGA-Type Density Functional Constructed with a Long-range Dispersion Correction. *J. Comput. Chem.* **2006**, *27*, 1787–1799, DOI: 10.1002/jcc.20495.
- 5 Chai, J.-D.; Head-Gordon, M. Long-range Corrected Hybrid Density Functionals with Damped Atom-atom Dispersion Corrections. *Phys. Chem. Chem. Phys.* **2008**, *10*, 6615–6620, DOI: 10.1039/B810189B.
- 6 Grimme, S.; Antony, J.; Ehrlich, S.; Krieg, H. A Consistent and Accurate ab Initio Parametrization of Density Functional Dispersion Correction (DFT-D) for the 94 Elements H–Pu. *J. Chem. Phys.* **2010**, *132*, 154104, DOI: 10.1063/1.3382344.
- 7 Grimme, S.; Ehrlich, S.; Goerigk, L. Effect of the Damping Function in Dispersion Corrected Density Functional Theory. *J. Comput. Chem.* **2011**, *32*, 1456–1465, DOI: 10.1002/jcc.21759.
- 8 Tkatchenko, A.; Scheffler, M. Accurate Molecular van Der Waals Interactions From Ground-state Electron Density and Free-atom Reference Data. *Phys. Rev. Lett.* **2009**, *102*, 073005, DOI: 10.1103/physrevlett.102.073005.
- 9 Tkatchenko, A.; DiStasio, R. A.; Car, R.; Scheffler, M. Accurate and Efficient Method for Many-Body van der Waals Interactions. *Phys. Rev. Lett.* **2012**, *108*, 236402, DOI: 10.1103/physrevlett.108.236402.

- 10 Bučko, T.; Lebègue, S.; Hafner, J.; Ángyán, J. G. Improved Density Dependent Correction for the Description of London Dispersion Forces. *J. Chem. Theory Comput.* **2013**, *9*, 4293–4299, DOI: 10.1021/ct400694h.
- 11 Bučko, T.; Lebègue, S.; Ángyán, J. G.; Hafner, J. Extending the Applicability of the Tkatchenko-Scheffler Dispersion Correction via Iterative Hirshfeld Partitioning. *J. Chem. Phys.* **2014**, *141*, 034114, DOI: 10.1063/1.4890003.
- 12 Steinmann, S. N.; Corminboeuf, C. A Generalized-gradient Approximation Exchange Hole Model for Dispersion Coefficients. *J. Chem. Phys.* **2011**, *134*, 044117, DOI: 10.1063/1.3545985.
- 13 Steinmann, S. N.; Corminboeuf, C. Comprehensive Benchmarking of a Density-dependent Dispersion Correction. *J. Chem. Theory Comput.* **2011**, *7*, 3567–3577, DOI: 10.1021/ct200602x.
- 14 Adamo, C.; Barone, V. Toward Reliable Density Functional Methods Without Adjustable Parameters: The PBE0 Model. *J. Chem. Phys.* **1999**, *110*, 6158.
- 15 Casimir, H. B. G.; Polder, D. *Phys. Rev. B* **1948**, *73*, 360.
- 16 Axilrod, B. M.; Teller, E. *J. Chem. Phys.* **1943**, *11*, 299–300.
- 17 Muto, Y. Force Between Nonpolar Molecules. *Proc. Phys. Math. Soc. Japan* **1943**, *17*, 629–631.
- 18 Bultinck, P.; Van Alsenoy, C.; Ayers, P. W.; Carbó-Dorca, R. Critical analysis and extension of the Hirshfeld atoms in molecules. *J. Chem. Phys.* **2007**, *126*, 144111, DOI: 10.1063/1.2715563.
- 19 Becke, A. D.; Johnson, E. R. Exchange-hole dipole moment and the dispersion interaction revisited. *J. Chem. Phys.* **2007**, *127*, 154108, DOI: 10.1063/1.2795701.
- 20 Tang, K. T.; Toennies, J. P. An improved simple model for the van der Waals potential based on universal damping functions for the dispersion coefficients. *J. Chem. Phys.* **1984**, *80*, 3726–3741, DOI: 10.1063/1.447150.

- 21 Straumanis, M. E.; Yu, L. S. Lattice Parameters, Densities, Expansion Coefficients and Perfection of Structure of Cu and of Cu–In  $\alpha$  Phase. *Acta Crystallogr. A* **1969**, *25*, 676–682, DOI: 10.1107/S0567739469001549.
- 22 Young, D. A. CHAPTER 13. The Transition Metals. In *Phase Diagrams of the Elements*; University of California Press: Ewing, NJ, USA, 2020; pp 168–195, DOI: 10.1525/9780520911482-014.
- 23 Rumble, J. R. *CRC Handbook of Chemistry and Physics, 102nd Edition (Internet Version 2021)*; CRC Press/Taylor & Francis, 2021.
- 24 Freund, L. B.; Suresh, S. *Thin Film Materials: Stress, Defect Formation and Surface Evolution*; Cambridge University Press: Cambridge, England, UK, 2004; DOI: 10.1017/CB09780511754715.
- 25 Ledbetter, H. M. Sound Velocities and Elastic-constant Averaging for Polycrystalline Copper. *J. Phys. D: Appl. Phys.* **1980**, *13*, 1879–1884, DOI: 10.1088/0022-3727/13/10/017.
- 26 de Boer, F. R.; Mattens, W. C. M.; Boom, R.; Miedema, A. R.; Niessen, A. K. *Cohesion in Metals: Transition Metal Alloys*; Cohesion and structure; North-Holland, 1988.
- 27 Michaelson, H. B. The Work Function of the Elements and Its Periodicity. *J. Appl. Phys.* **1977**, *48*, 4729–4733, DOI: 10.1063/1.323539.
- 28 Johnson, R. D. NIST Computational Chemistry Comparison and Benchmark Database, NIST Standard Reference Database Number 101 Release 21. 2020; <http://cccbdb.nist.gov/>.
